# Supplementary material for: Epidemiology of Hand, Foot, and Mouth Disease and Genetic Evolutionary Characteristics of Coxsackievirus A10 in Taiyuan City, Shanxi Province from 2016 to 2020
Source: MDPI journal article supplement (doi:10.3390/v15030694), 2023-03-07
Supplement: s1 [file s1]

**Supplementary Table S1.** GenBank accession numbers assigned for all the CVA10-Taiyuan sequences based on entire VP1 region sequenced in this study.

| Coxsackievirus A10 (VP1) |                        |                  |                        |
|--------------------------|------------------------|------------------|------------------------|
| Accession Number         | Strain                 | Accession Number | Strain                 |
| OP244619                 | TY2016022-SX-CHN-CVA10 | OP244635         | TY2019008-SX-CHN-CVA10 |
| OP244620                 | TY2016033-SX-CHN-CVA10 | OP244636         | TY2019031-SX-CHN-CVA10 |
| OP244621                 | TY2016080-SX-CHN-CVA10 | OP244637         | TY2019032-SX-CHN-CVA10 |
| OP244622                 | TY2016140-SX-CHN-CVA10 | OP244638         | TY2019148-SX-CHN-CVA10 |
| OP244623                 | TY2016143-SX-CHN-CVA10 | OP244639         | TY2019191-SX-CHN-CVA10 |
| OP244624                 | TY2016188-SX-CHN-CVA10 | OP244640         | TY2019243-SX-CHN-CVA10 |
| OP244625                 | TY2016196-SX-CHN-CVA10 | OP244641         | TY2019257-SX-CHN-CVA10 |
| OP244626                 | TY2016198-SX-CHN-CVA10 | OP244642         | TY2019363-SX-CHN-CVA10 |
| OP244627                 | TY2016199-SX-CHN-CVA10 | OP244643         | TY2019393-SX-CHN-CVA10 |
| OP244628                 | TY2016213-SX-CHN-CVA10 | OP244644         | TY2019434-SX-CHN-CVA10 |
| OP244629                 | TY2016216-SX-CHN-CVA10 | OP244645         | TY2019440-SX-CHN-CVA10 |
| OP244630                 | TY2016267-SX-CHN-CVA10 | OP244646         | TY2019462-SX-CHN-CVA10 |
| OP244631                 | TY2016536-SX-CHN-CVA10 | OP244647         | TY2019534-SX-CHN-CVA10 |
| OP244632                 | TY2018007-SX-CHN-CVA10 | OP244648         | TY2019543-SX-CHN-CVA10 |
| OP244633                 | TY2018364-SX-CHN-CVA10 | OP244649         | TY2020207-SX-CHN-CVA10 |
| OP244634                 | TY2018441-SX-CHN-CVA10 |                  |                        |
